# Supplementary material
Source: Springer Nature journal article supplement (https://www.springermedizin.de/resource/supplementary/12889_2014_6951_MOESM5_ESM.pdf/9499446)

No. of medicines  
in percentage

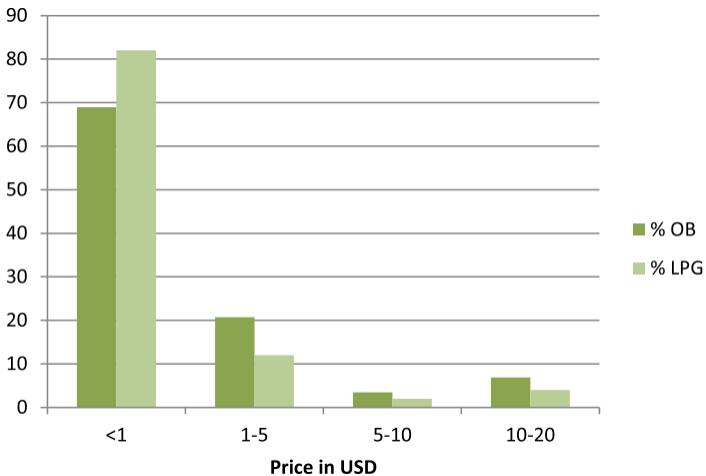

Supplement: MOESM5 [file 9499446]
